# Supplementary material for: Thalamo-cortical Synchrony Shapes Seizure Expression in Human Temporal Lobe Epilepsy
Source: Research Square preprint supplement (doi:10.21203/rs.3.rs-7419263/v1), 2025-08-27
Supplement: Supplementary file 1 [file 0556fd6de879358b61bd27c2.docx]

**Supplementary Table 1**: Enrolled Thalamus electrode using the Automated anatomical labelling atlas 3 (AAL3) atlas (Abbreviations: Thal_PuM: Left pulvinar medial, Thal_PuL: Left pulvinar lateral, Thal_MDm: Mediodorsal medial magnocellular, Thal_MDI: Mediodorsal lateral parvocellular, Thal_IL: Intralaminar, Thal_VPL: Ventral posterolateral, Thal_VA: Ventral anterior, Thal_AV: Anteroventral, Thal_VLa: Ventral lateral anterior, NA: none, L: Left, R: Right)

| Subject Number. | Enrolled thalamus electrode name and its contact | MNI coordinate (nonlinear) | | | AAL3atlas at radius 0.4 mm |
| --- | --- | --- | --- | --- | --- |
| X | Y | Z |
| 1 | LTPS1 | -6.30 | -30.52 | -0.12 | Thal_PuM L |
|  | LTPS2 | -10.15 | -30.88 | -0.12 | Thal_PuM L |
| 2 | LTPS2 | -8.16 | -28.04 | -0.47 | Thal_PuM L |
|  | LTPS3 | -11.91 | -27.91 | -0.32 | Thal_PuM L |
| 3 | LTMS1 | -6.81 | -31.25 | 1.48 | Thal_PuM L |
|  | LTMS2 | -10.72 | -30.83 | 1.39 | Thal_PuM L |
| 4 | LTPS1 | -6.88 | -29.44 | 0.56 | Thal_PuM L |
|  | LTPS2 | -10.33 | -29.89 | 0.92 | Thal_PuM L |
| 5 | RTPS3 | 14.01 | -25.60 | 0.46 | Thal_PuM R |
|  | RTPS4 | 17.60 | -25.34 | 0.62 | Thal_PuA R |
| 6 | RThA1 | 7.04 | -10.08 | 4.11 | Thal_VLa R |
|  | RThA2 | 10.74 | -9.39 | 6.22 | Thal_VLa R |
|  | RThC3 | 14.16 | -24.97 | 3.95 | Thal_PuM R |
|  | RThC4 | 17.39 | -23.94 | 7.19 | Thal_PuM R |
| 7 | LANT1 | -6.87 | -8.45 | 11.99 | Thal_VLa L |
|  | LANT2 | -10.05 | -9.27 | 13.52 | Thal_VLa L |
| 8 | LPAI3 | -10.25 | -21.62 | 3.27 | Thal_PuL L |
|  | LPAI4 | -14.25 | -21.28 | 6.03 | Thal_VPL L |
| 9 | RTPS1 | 12.89 | -23.90 | -2.31 | Thal_PuL L |
|  | RTPS2 | 16.19 | -23.89 | -1.51 | Thal_PuA L |
| 10 | LTPS1 | -9.24 | -30.78 | -6.41 | NA |
|  | LTPS2 | -13.31 | -30.44 | -5.87 | NA |
| 11 | LTPS-P1 | -3.88 | -24.52 | 0.16 | NA |
|  | LTPS-P2 | -7.39 | -24.04 | -0.37 | Thal_PuM L |
| 12 | U'1 | -16.25 | -30.98 | 4.72 | Thal_ PuM L |
|  | U'2 | -20.29 | -30.58 | 4.76 | Thal_PuA L |
| 13 | L1 | 7.85 | -27.08 | 3.25 | Thal_PuM R |
|  | L2 | 11.53 | -27.11 | 3.61 | Thal_PuM R |
|  | R1 | 8.54 | -12.87 | 4.29 | Thal_MDl R |
|  | R2 | 12.21 | -12.67 | 4.57 | Thal_Vla R |
| 14 | D2 | 22.45 | -31.54 | 2.66 | Thal_PuM R |
|  | D3 | 26.22 | -31.29 | 2.87 | NA |
| 15 | U'1 | -6.54 | -23.93 | 1.70 | Thal_PuM L |
|  | U'2 | -10.38 | -23.77 | 1.76 | Thal_PuM L |
| 16 | R'1 | -9.43 | -6.38 | 5.83 | Thal_VA L |
|  | R'2 | -13.25 | -6.48 | 5.77 | Thal_VA L |
| 17 | R'1 | -4.13 | -8.36 | 8.44 | Thal_AV L |
|  | R'2 | -7.80 | -8.32 | 8.55 | Thal_VA L |
|  | U'1 | -7.65 | -27.96 | 5.32 | Thal_PuM L |
|  | U'2 | -11.29 | -27.80 | 5.56 | Thal_PuM L |
| 18 | U'1 | -8.04 | -28.34 | 2.61 | Thal_PuM L |
|  | U'2 | -11.65 | -28.13 | 2.81 | Thal_PuM L |
| 19 | R'1 | -11.13 | -5.79 | 9.47 | Thal_Vla L |
|  | R'2 | -14.94 | -5.72 | 9.48 | NA |
|  | U'1 | -13.15 | -29.55 | 5.71 | Thal_PuM L |
|  | U'2 | -17.07 | -29.49 | 6.06 | Thal_PuM L |
| 20 | U1 | 10.68 | -28.04 | 5.46 | Thal_PuM R |
|  | U2 | 14.47 | -27.59 | 5.62 | Thal_PuM R |
| 21 | U'1 | -8.49 | -29.63 | 5.26 | Thal_PuM L |
|  | U'2 | -11.92 | -29.40 | 5.22 | Thal_PuM L |
| 22 | U1 | 10.89 | -30.12 | 2.56 | Right PuM |
|  | U2 | 14.52 | -30.03 | 2.83 | Right PuM |
| 23 | U'1 | -8.08 | -28.66 | 11.90 | Thal_PuM L |
|  | U'2 | -11.80 | -28.28 | 11.95 | Thal_PuM L |
| 24 | U'1 | -6.11 | -28.69 | 3.59 | Thal_PuM L |
|  | U'2 | -10.10 | -28.80 | 3.45 | Thal_PuM L |
| 25 | U'1 | -5.31 | -26.77 | 10.98 | Thal_PuM L |
|  | U'2 | -8.90 | -26.94 | 11.08 | Thal_PuM L |
| 26 | U1 | 6.66 | -26.77 | 6.24 | Thal_PuM R |
|  | U2 | 10.37 | -26.54 | 6.12 | Thal_PuM R |
| 27 | U'1 | -7.06 | -30.21 | 6.25 | Thal_PuM L |
|  | U'2 | -10.74 | -30.43 | 6.12 | Thal_PuM L |
| 28 | U'1 | -6.62 | -25.79 | 2.71 | Thal_PuM L |
|  | U'2 | -10.07 | -25.84 | 2.78 | Thal_PuM L |
| 29 | U'1 | -9.97 | -30.00 | 5.27 | Thal_PuM L |
|  | U'2 | -13.82 | -30.01 | 5.33 | Thal_PuM L |
| 30 | U3 | 10.85 | -22.91 | 4.69 | Thal_PuM R |
|  | U4 | 14.48 | -22.57 | 4.89 | Thal_PuM R |
| 31 | Z'1 | -4.66 | -28.26 | 9.92 | NA |
|  | Z'2 | -8.45 | -28.34 | 9.71 | Thal_PuM L |
| 32 | U'1 | -2.02 | -25.30 | 4.23 | Thal_PuM L |
|  | U'2 | -6.14 | -25.36 | 4.40 | Thal_PuM L |
| 33 | R1 | 5.27 | -5.48 | 4.44 | Thal_AV R |
|  | R2 | 8.29 | -5.24 | 4.75 | Thal_VLa R |
|  | U1 | 9.80 | -25.70 | 6.44 | Thal_PuM R |
|  | U2 | 13.03 | -25.25 | 6.38 | Thal_PuM R |
| 34 | U1 | 4.89 | -24.38 | 8.87 | Thal_PuM R |
|  | U2 | 8.88 | -24.28 | 8.87 | Thal_PuM R |
| 35 | U'1 | -10.54 | -26.64 | 4.24 | Thal_PuM L |
|  | U'2 | -14.24 | -26.36 | 4.50 | Thal_PuM L |
| 36 | R'1 | -14.80 | -7.67 | 10.65 | Thal_VLa L |
|  | R'2 | -19.28 | -22.47 | 4.34 | Thal_VLa L |
| 37 | U2 | 12.95 | -21.40 | 4.61 | Thal_MDm L |
|  | U3 | 16.82 | -21.17 | 4.48 | Thal_PuL R |
| 38 | U'3 | -13.52 | -24.78 | 7.66 | Thal_PuM L |
|  | U'4 | -17.32 | -24.81 | 7.75 | Thal_PuL L |
| 39 | U'3 | -15.67 | -21.61 | -1.40 | Thal_IL L |
|  | U'4 | -5.71 | -6.24 | 7.15 | Thal_VPL L |
| 40 | R'2 | -9.41 | -6.23 | 7.21 | Thal_VLa L |
|  | R'3 | -13.13 | -6.21 | 7.29 | Thal_VA L |
|  | U'3 | -8.73 | -23.06 | 2.19 | Thal_PuL L |
|  | U'4 | -12.34 | -23.21 | 2.23 | Thal_PuL L |
| 41 | U2 | 10.32 | -21.20 | 4.35 | Thal_MDm R |
|  | U3 | 13.89 | -21.11 | 4.32 | Thal_PuL R |
| 42 | U'2 | -11.65 | -30.00 | 2.95 | Thal_PuM L |
|  | U'3 | -15.44 | -30.08 | 3.13 | Thal_PuM L |
| 43 | U'2 | -10.71 | -26.12 | 7.05 | Thal_PuM L |
|  | U'3 | -14.21 | -25.92 | 6.89 | Thal_PuM L |
|  | R'1 | -10.19 | -7.06 | 10.63 | Left VLa |
|  | R'2 | -13.67 | -6.98 | 10.43 | Left VLa |
| 44 | U2 | 12.93 | -24.36 | 3.99 | Thal_PuM R |
|  | U3 | 16.71 | -24.34 | 3.98 | Thal_PuM R |
| 45 | U1 | 13.76 | -22.80 | 6.44 | Thal_PuM R |
|  | U2 | 17.70 | -22.98 | 6.46 | Thal_PuM R |
| 46 | U'3 | -9.04 | -31.90 | -3.48 | NA |
|  | U'4 | -12.58 | -32.03 | -3.35 | Thal_PuA L |
| 47 | U'1 | -3.69 | -25.95 | 4.53 | NA |
|  | U'2 | -7.63 | -25.98 | 4.42 | Thal_PuM L |
| 48 | U'1 | -8.70 | -30.09 | 4.31 | Thal_PuM L |
|  | U'2 | -12.31 | -29.81 | 3.99 | Thal_PuM L |
| 49 | U3 | 12.00 | -26.59 | 10.59 | Thal_PuM R |
|  | U4 | 15.42 | -26.73 | 10.41 | Thal_PuM R |
| 50 | U'2 | -13.14 | -28.62 | 6.12 | Thal_PuM L |
|  | U'3 | -17.11 | -28.52 | 5.83 | Thal_PuM L |
| 51 | U'2 | -10.53 | -27.74 | 4.67 | Thal_PuM L |
|  | U'3 | -14.26 | -27.58 | 4.62 | Thal_PuM L |
| 52 | R'2 | -8.12 | -7.59 | 5.25 | Thal_VA L |
|  | R'3 | -11.66 | -7.69 | 5.34 | Thal_VA L |
|  | U'1 | -7.12 | -29.45 | 6.96 | Thal_PuM L |
|  | U'2 | -10.65 | -29.48 | 6.91 | Thal_PuM L |
| 53 | U'1 | -7.20 | -26.31 | -0.27 | Thal_PuM L |
|  | U'2 | -11.15 | -26.54 | -0.52 | Thal_PuM L |
| 54 | U1 | 7.03 | -24.76 | 7.08 | Thal_PuM R |
|  | U2 | 11.00 | -24.73 | 7.15 | Thal_PuM R |
| 55 | U'1 | -9.13 | -26.52 | -1.38 | Thal_PuM L |
|  | U'2 | -12.83 | -26.68 | -1.34 | Thal_PuA L |
| 56 | U'1 | -7.31 | -26.11 | 4.91 | Thal_PuM L |
|  | U'2 | -11.05 | -26.07 | 4.73 | Thal_PuM L |
| 57 | R'2 | -9.32 | -27.52 | 11.08 | Thal_VA L |
|  | R'3 | -12.86 | -27.26 | 11.07 | Thal_VA L |
|  | U'1 | -5.87 | -26.43 | 3.54 | Thal_PuM L |
|  | U'2 | -9.66 | -26.70 | 3.79 | Thal_PuM L |
| 58 | U'1 | -5.79 | -27.73 | 11.19 | Thal_PuM L |
|  | U'2 | -9.32 | -27.52 | 11.08 | Thal_PuM L |
| 59 | U'1 | -8.14 | -26.45 | 9.16 | Thal_PuM L |
|  | U'2 | -11.71 | -26.35 | 8.97 | Thal_PuM L |
| 60 | U'1 | -5.91 | -28.56 | -1.31 | NA |
|  | U'2 | -9.39 | -28.56 | -1.31 | Thal_PuM L |
| 61 | R'1 | -8.77 | -7.71 | 11.69 | Thal_VLa L |
|  | R'2 | -12.32 | -7.90 | 11.49 | Thal_VLa L |
|  | U'2 | -7.85 | -25.47 | 8.79 | Thal_PuM L |
|  | U'3 | -11.28 | -25.75 | 8.63 | Thal_PuM L |
| 62 | R1 | 8.25 | 0.19 | 4.90 | Thal_VA R |
|  | R2 | 12.08 | 0.06 | 5.25 | Thal_VA R |
|  | U2 | 8.69 | -28.21 | 6.13 | Thal_PuM R |
|  | U3 | 12.49 | -28.19 | 5.81 | Thal_PuM R |
