# Supplementary material for: Thalamo-cortical Synchrony Shapes Seizure Expression in Human Temporal Lobe Epilepsy
Source: Research Square preprint supplement (doi:10.21203/rs.3.rs-7419263/v1), 2025-08-27
Supplement: Supplementary file 2 [file 9de187093a83754044f1ebd7.docx]

# Supplementary table 3: Univariate and Multivariate Linear Regression Models Predicting Thalamo–Temporal Correlation Values

Note: Coefficients (β), standard errors, 95% confidence intervals, and p-values are reported. Seizure type was coded as 0 = clinical (CS) and 1 = nonclinical (NCS); thalamic region as 0 = pulvinar and 1 = anterior thalamic group (ATG); epilepsy subtype was treated as ordinal (1 = mesial, 2 = lateral, 3 = mesiolateral); seizure freedom status as 0 = not seizure-free (NSF) and 1 = seizure-free (SF). Significant p-values (< 0.05) are shown in bold.

| Model | Predictor | β (Coefficient) | Standard Error | 95% CI Lower | 95% CI Upper | p-value |
| --- | --- | --- | --- | --- | --- | --- |
| Multivariate | Seizuretype (NCS vs. CS) | -0.1663 | 0.0282 | -0.2218 | -0.1108 | **< 0.001** |
| Multivariate | Thalamus (ATG vs. Pulvinar) | 0.0082 | 0.0280 | -0.0468 | 0.0632 | 0.770 |
| Multivariate | Epilepsy Subtype (ordinal: 1=mesial, 2=lateral, 3=mesiolateral) | -0.0233 | 0.0152 | -0.0531 | 0.0066 | 0.126 |
| Multivariate | Seizure Freedom (SF vs. NSF) | -0.0000 | 0.0004 | -0.0007 | 0.0007 | 0.984 |
| Multivariate | Constant | 0.2818 | 0.0292 | 0.2244 | 0.3392 | **< 0.001** |
| Univariate | Seizuretype (NCS vs. CS) | -0.1620 | 0.0281 | -0.2172 | -0.1069 | **< 0.001** |
| Univariate | Constant | 0.2458 | 0.0128 | 0.2206 | 0.2709 | **< 0.001** |
