# Supplementary material for: Thalamo-cortical Synchrony Shapes Seizure Expression in Human Temporal Lobe Epilepsy
Source: Research Square preprint supplement (doi:10.21203/rs.3.rs-7419263/v1), 2025-08-27
Supplement: Supplementary file 3 [file ab11576126e4a1ce3ae211c6.docx]

**Supplementary Table 2**: Epileptogenic index (EI) values of thalamic electrodes in 38 patients with ≥12 months of postoperative follow-up with seizure freedom status in Engel Classification, including 37 with clinical seizures and 1 patient with only nonclinical seizures (*).

(Abbreviations of seizure types: FPC: focal preserved consciousness, FIC: focal impaired consciousness, FTBC: focal to bilateral clonic, NCS: nonclinical seizures)

| Subject Number. | Enrolled thalamus electrode name and its contact | Seizure Clinical Type | Epileptogenic index | Seizure outcome |
| --- | --- | --- | --- | --- |
| 3 | LTMS1-LTMS2 | FIC | 0.01 | 2A |
| 5 | RTPS3-RTPS4 | FIC | 0 | 3 |
| 6 | RThA1-RThA2 | FIC | 0.05 | 1A |
| RThC3-RTHC4 | 0 |
| 8 | LPAI3-LPAI4 | FTBC | 0 | 2A |
| 12 | U'1- U’2 | FIC | 0.1 | 2B |
| 14 | D2-D3 | FPC | 0.18 | 1A |
| 15 | U'1-U’2 | FTBC | 0 | 3 |
| 16 | R'1-R’2 | FIC | 0.2 | 3 |
| 17 | R'1-R’2 | FPC | 0.02 | 2C |
| U'1-U’2 | 0 |
| 18 | U'1-U’2 | FIC | 0 | 1A |
| 19 | R'1-R’2 | FTBC | 0 | 1D |
| U'1-U’2 | 0 |
| 20 | U1-U2 | FTBC | 0 | 1A |
| 21 | U'1-U’2 | FTBC | 0.39 | 2A |
| 22 | U1-U2 | FIC | 0 | 1C |
| 23 | U'1-U’2 | FTBC | 0 | 2C |
| 24 | U'1-U’2 | FIC | 0 | 1A |
| 25 | U'1-U’2 | FPC | 0.04 | 1A |
| 28 | U'1-U’2 | FPC | 0 | 1A |
| 29 | U'1-U’2 | FIC | 0 | 3 |
| 30 | U3-U4 | NCS* | 0 | 1D |
| 32 | U'1-U’2 | FIC | 0 | 1A |
| 33 | R1-R2 | FIC | 0 | 1A |
| U1-U2 | 0 |
| 34 | U1-U2 | FIC | 0 | 1D |
| 35 | U'1-U’2 | FPC | 0 | 1A |
| 36 | R'1-R’2 | FPC | 0 | 1A |
| 37 | U2-U3 | FIC | 0 | 1A |
| 38 | U'3-U’4 | FPC | 0 | 1D |
| 41 | U2-U3 | FPC | 0 | 1A |
| 42 | U'2-U’3 | FPC | 0 | 1A |
| 43 | U'2-U’3 | FPC | 0 | 1D |
| R’1-R’2 | 0 |
| 44 | U2-U3 | FIC | 0 | 1A |
| 45 | U2-U3 | FTBC | 0.33 | 1A |
| 46 | U'3-U’4 | FTBC | 0 | 1A |
| 47 | U'1-U’2 | FIC | 0 | 1A |
| 48 | U'1-U’2 | FIC | 0 | 2A |
| 49 | U3-U4 | FPC | 0 | 2A |
| 51 | U'2-U’3 | FTBC | 0 | 2A |
| 52 | R'2-R’3 | FTBC | 0 | 1A |
| U'1-U’2 | 0 |
